# Supplementary material
Source: PubMed Central journal article supplement (PMC7233372)
Supplement: NIHMS1565517-supplement-2.pdf [file NIHMS1565517-supplement-2.pdf]

## Supplementary Information

**Title: Ligand-induced BIK1 monoubiquitination regulates plant immunity**

### Authors:

Xiyu Ma<sup>1,2</sup>, Lucas A. N. Claus<sup>3,4</sup>, Michelle E. Leslie<sup>5\*^</sup>, Kai Tao<sup>6\*</sup>, Zhiping Wu<sup>7\*</sup>, Jun Liu<sup>1,2</sup>, Xiao Yu<sup>2,8</sup>, Bo Li<sup>2,8</sup>, Jinggeng Zhou<sup>1,2</sup>, Daniel V. Savatin<sup>3,4</sup>, Junmin Peng<sup>7</sup>, Brett M. Tyler<sup>6</sup>, Antje Heese<sup>5</sup>, Eugenia Russinova<sup>3,4</sup>, Ping He<sup>1,2#</sup> and Libo Shan<sup>2,8#</sup>

### Author Affiliations:

<sup>1</sup>Department of Biochemistry and Biophysics, Texas A&M University, College Station, TX 77843, USA

<sup>2</sup>Institute for Plant Genomics and Biotechnology, Texas A&M University, College Station, TX 77843, USA

<sup>3</sup>Department of Plant Biotechnology and Bioinformatics, Ghent University, 9052 Ghent, Belgium

<sup>4</sup>Center for Plant Systems Biology, VIB, 9052 Ghent, Belgium

<sup>5</sup>Department of Biochemistry, Interdisciplinary Plant Group, University of Missouri-Columbia, Columbia, Missouri 65211, USA

<sup>6</sup>Center for Genome Research and Biocomputing and Department of Botany and Plant Pathology, Oregon State University, Corvallis, Oregon 97331, USA

<sup>7</sup>Departments of Structural Biology and Developmental Neurobiology, Center for Proteomics and Metabolomics, St. Jude Children's Research Hospital, Memphis, TN 38105, USA

<sup>8</sup>Department of Plant Pathology and Microbiology, Texas A&M University, College Station, TX 77843, USA

\*These authors contribute equally.

^ Current address: Elemental Enzymes, 1685 Galt Industrial Blvd, St. Louis, MO, 63132, United States

### #Corresponding authors:

Ping He, email: pinghe@tamu.edu

Libo Shan, email: lshan@tamu.edu

## Content

**Supplementary Figure 1.** Uncropped images

Page 2-17.

**Supplementary Table 1.** Primers used in this study

Page 18-21.

**Figure 1e**

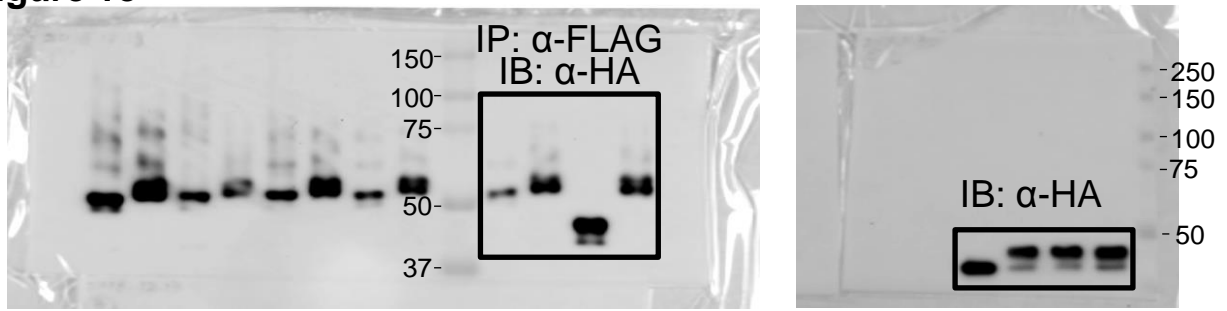

**Figure 1f**

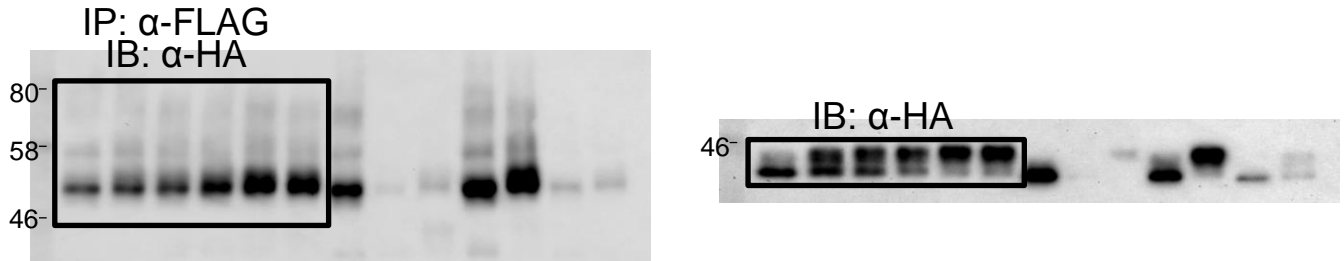

**Figure 1g**

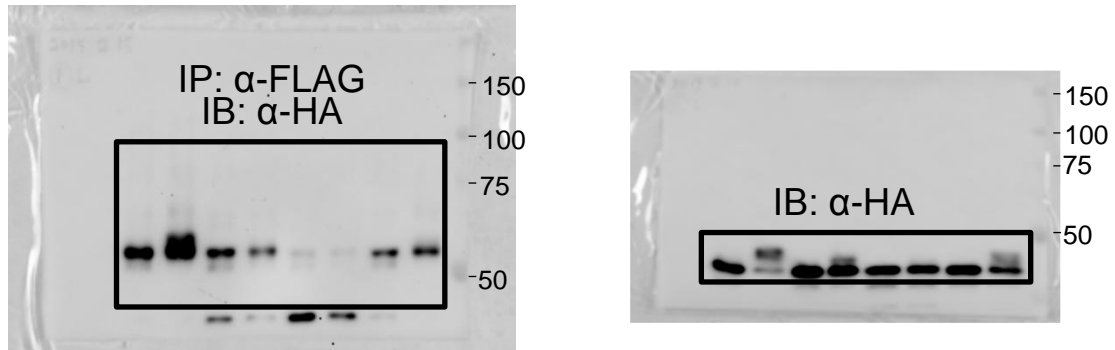

**Figure 2b**

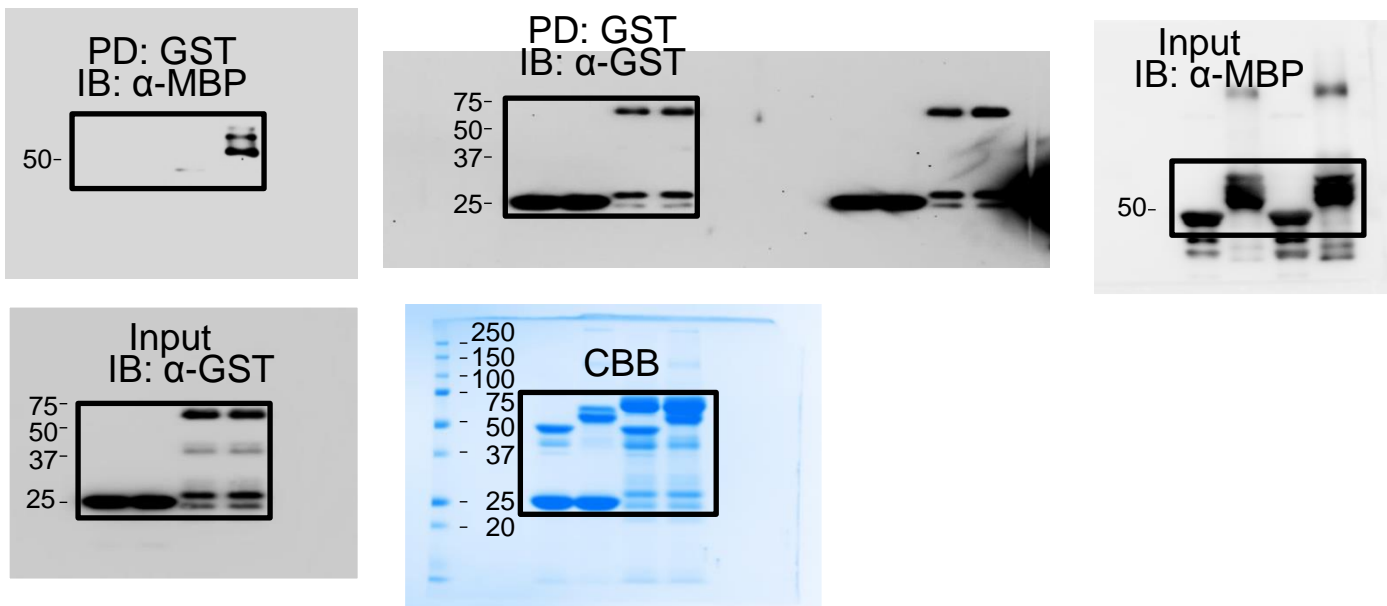

**Figure 2c**

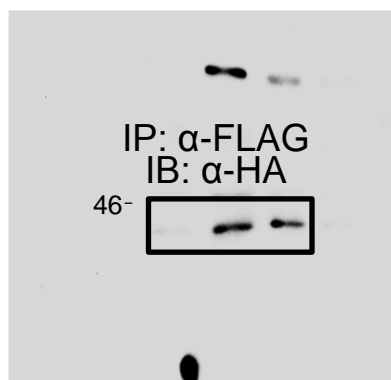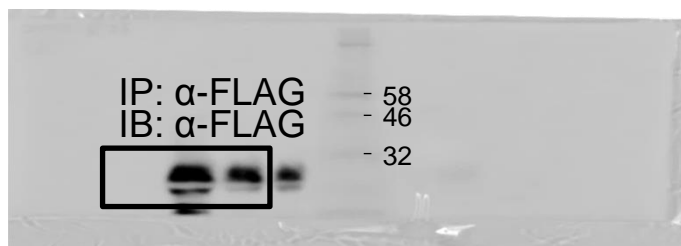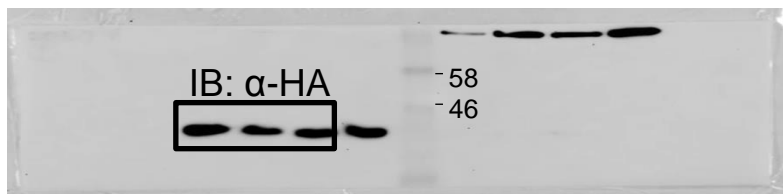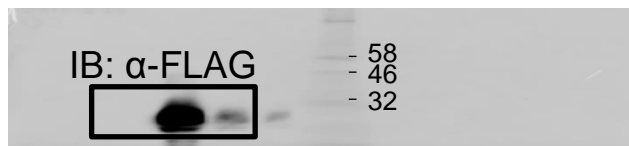

**Figure 2d**

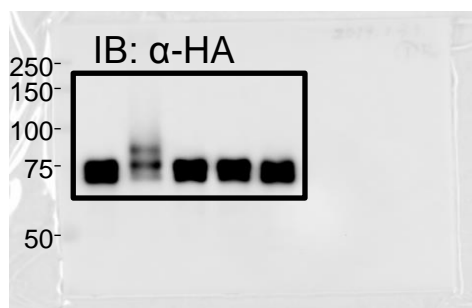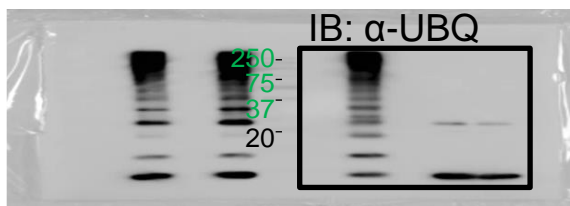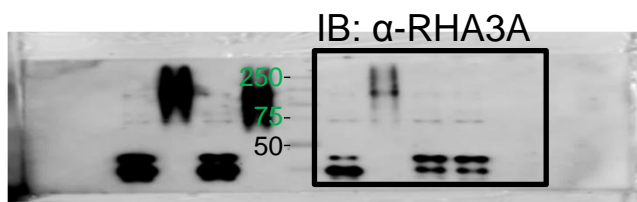

**Figure 2e**

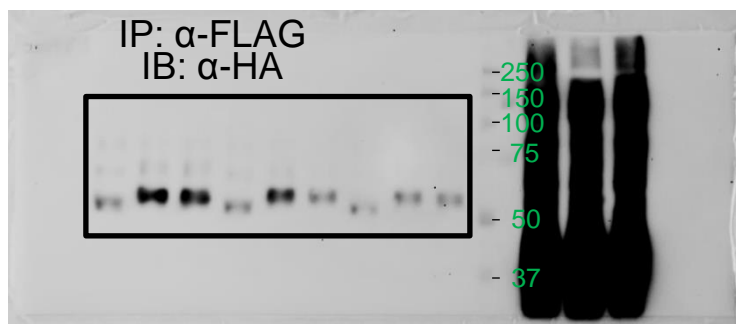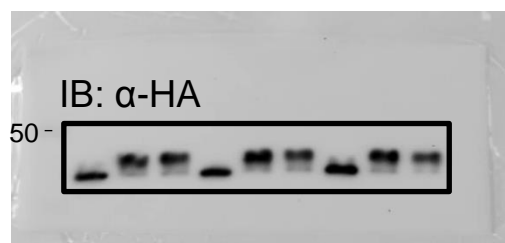

**Figure 3d**

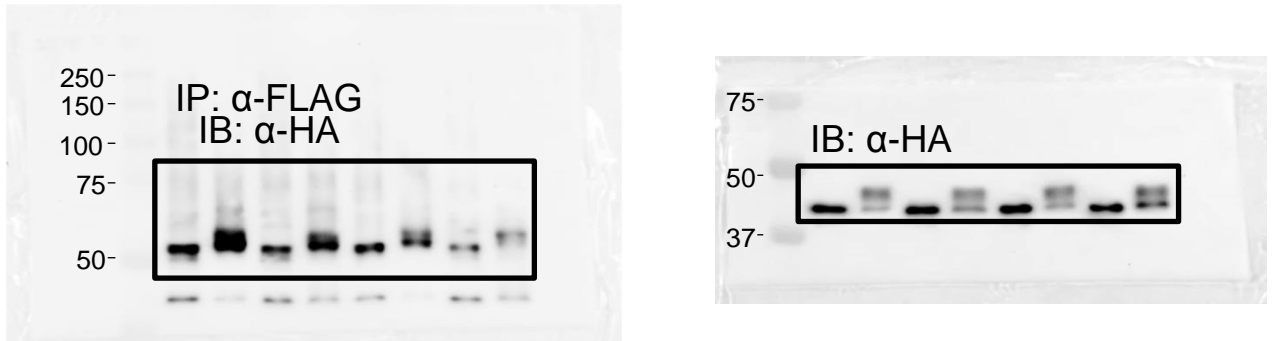

**Figure 3e**

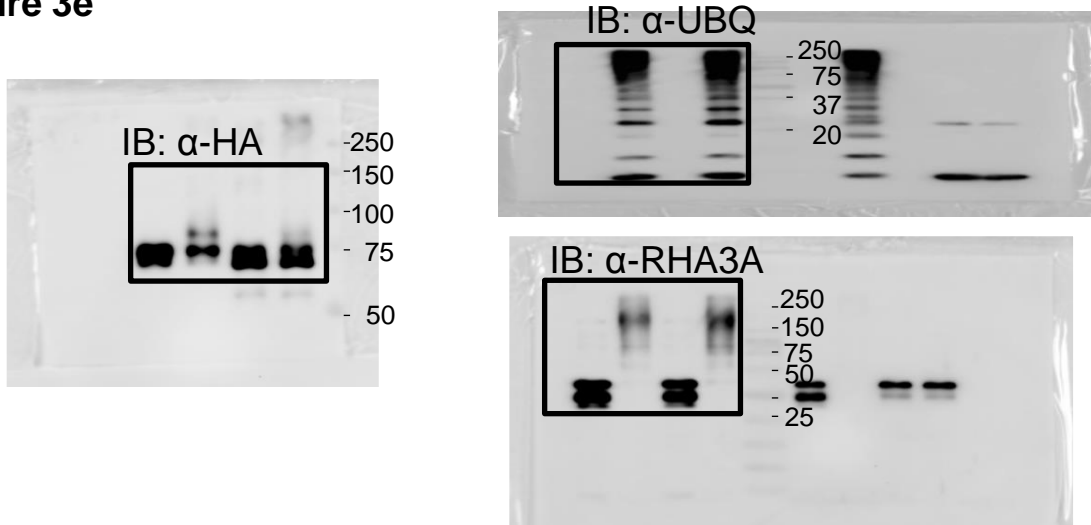

**Figure 3f**

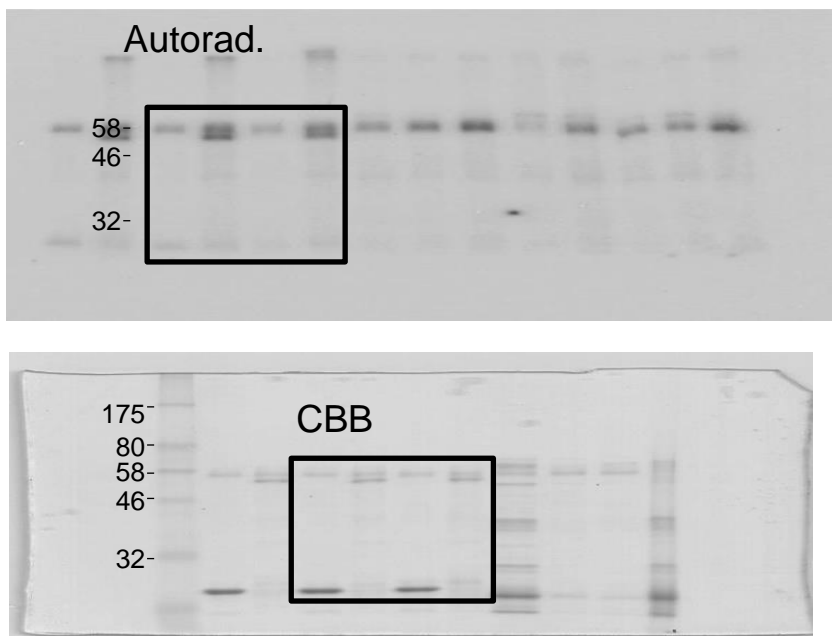

**Figure 4g**

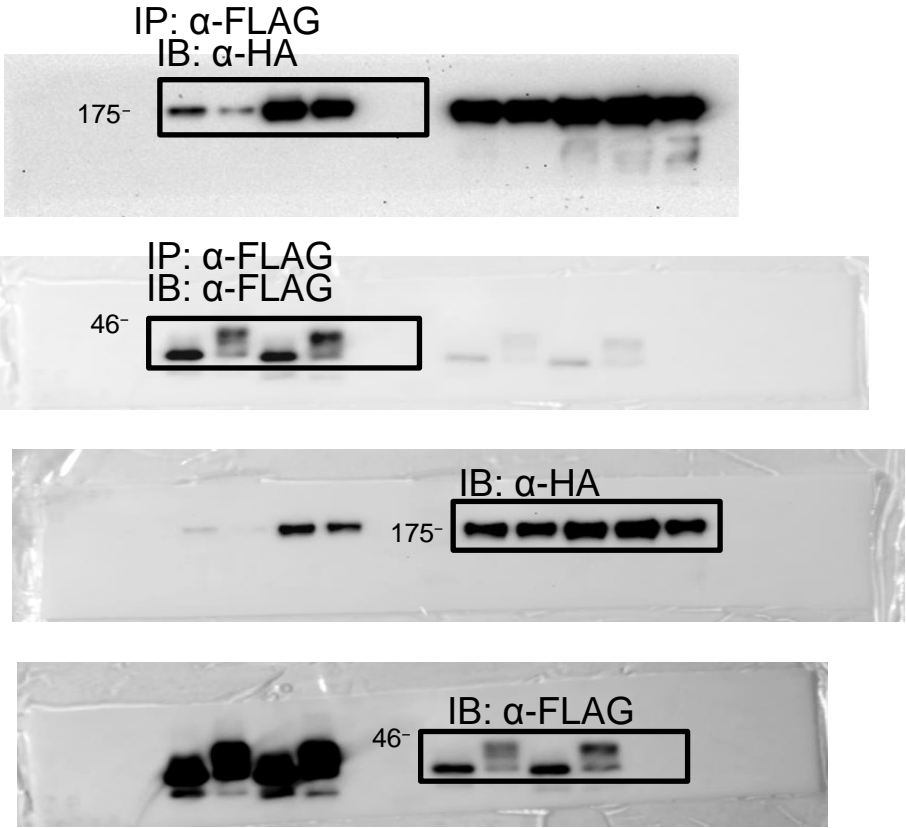

**Extended Data Figure 1a**

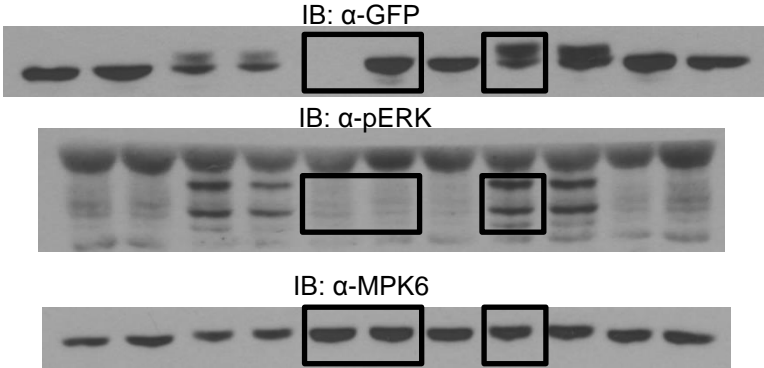

## Extended Data Figure 2a

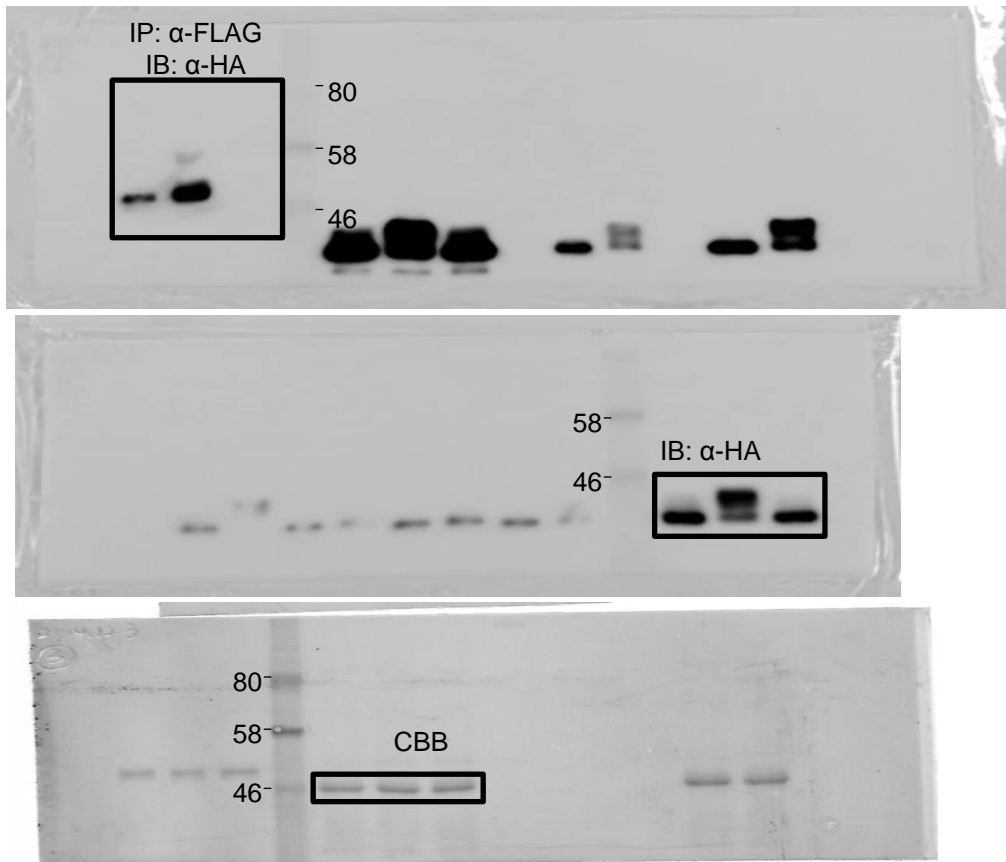

## Extended Data Figure 2b

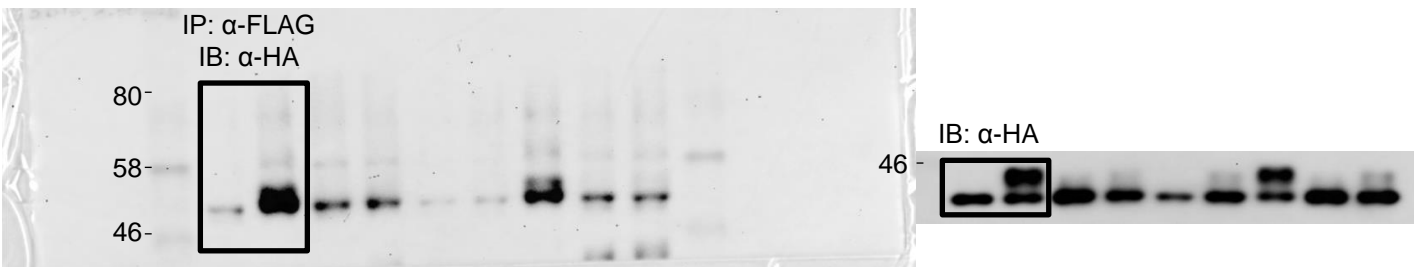

## Extended Data Figure 2c

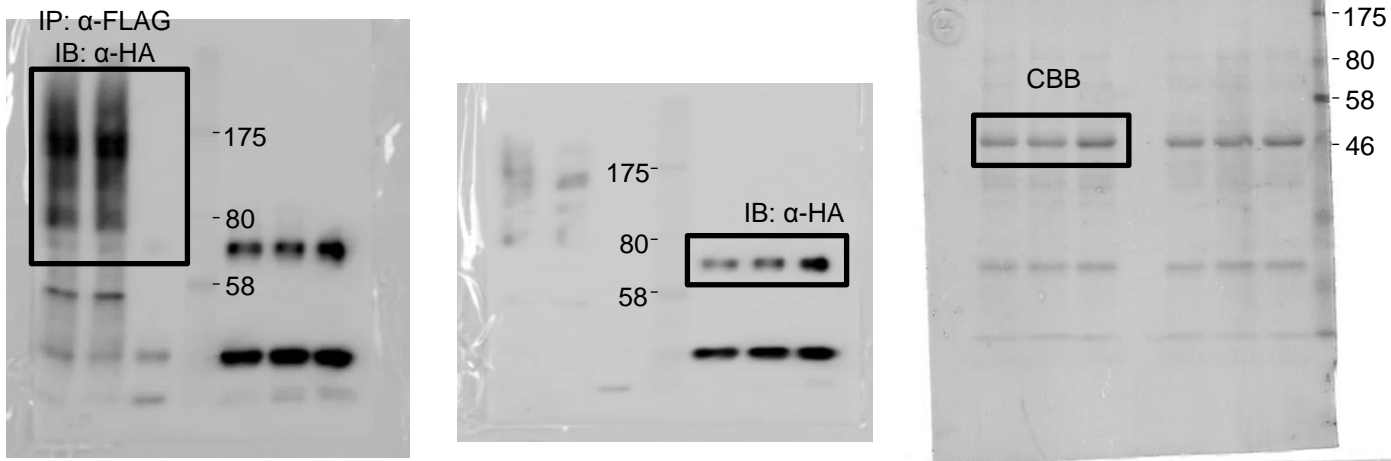

## Extended Data Figure 2d

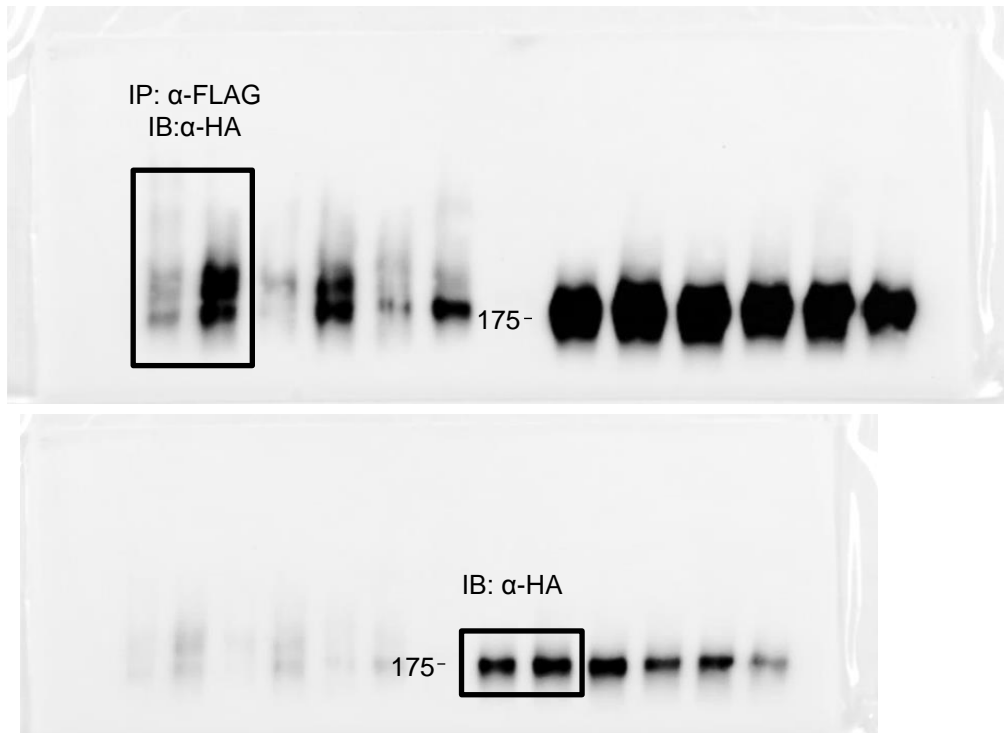

## Extended Data Figure 2e

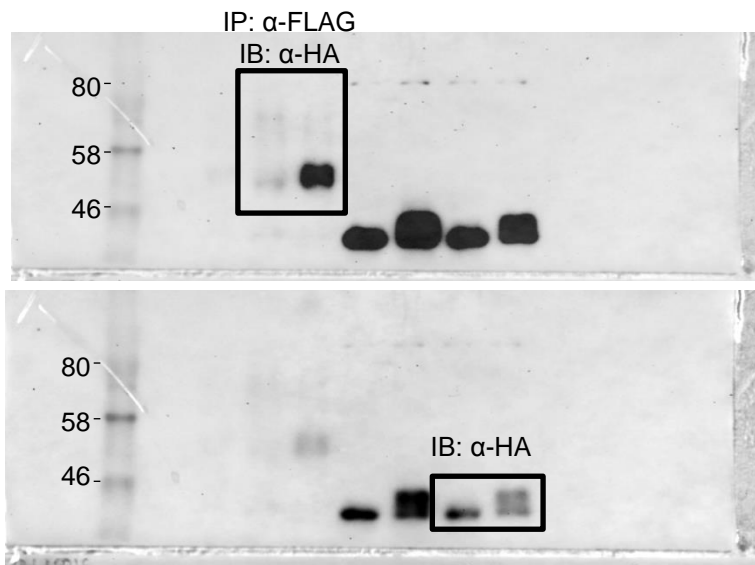

## Extended Data Figure 2f

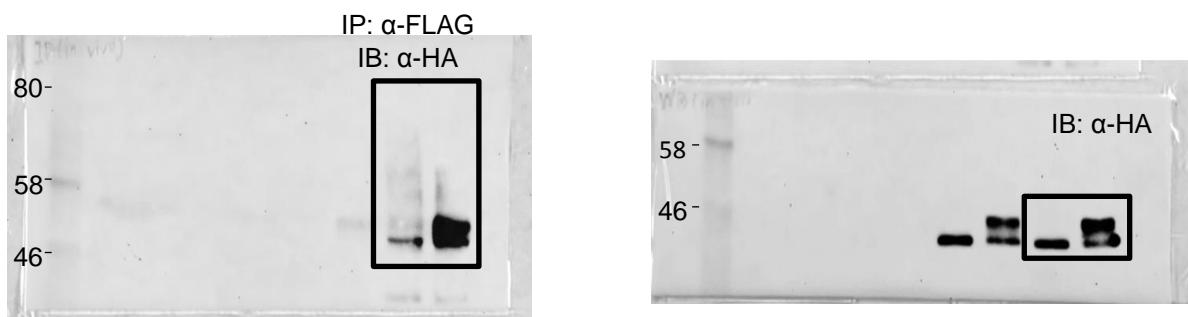

## Extended Data Figure 2g

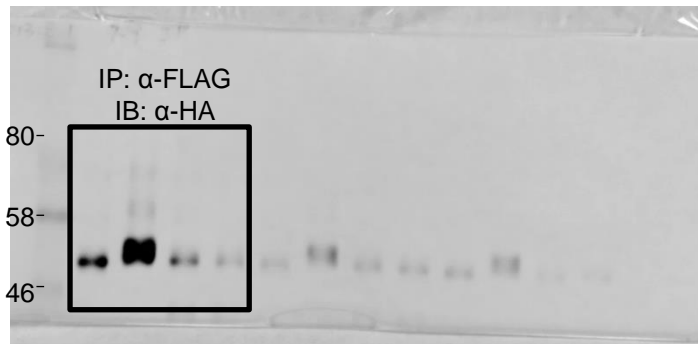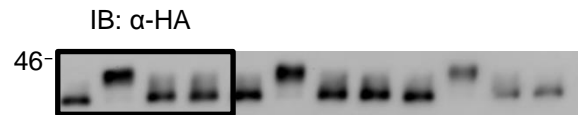

## Extended Data Figure 2h

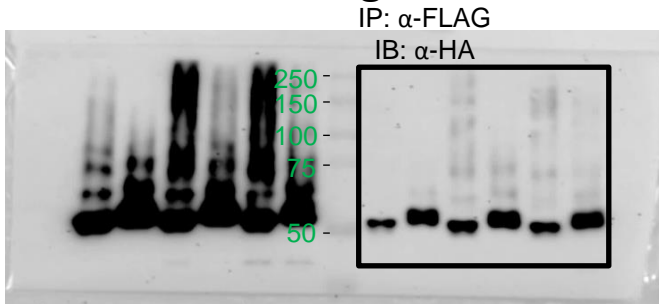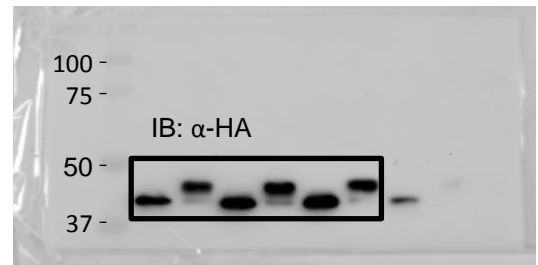

## Extended Data Figure 2i

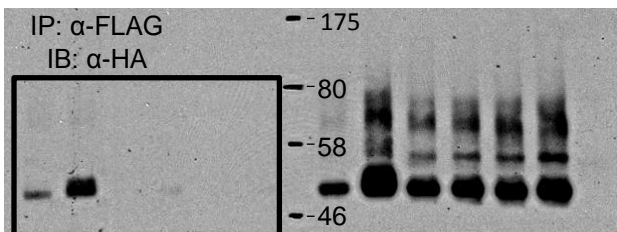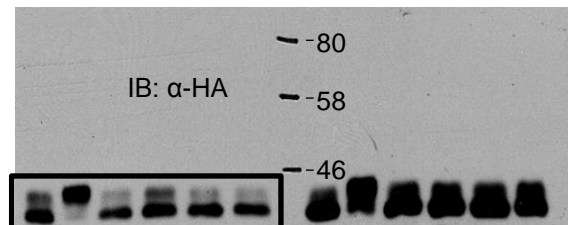

## Extended Data Figure 2j

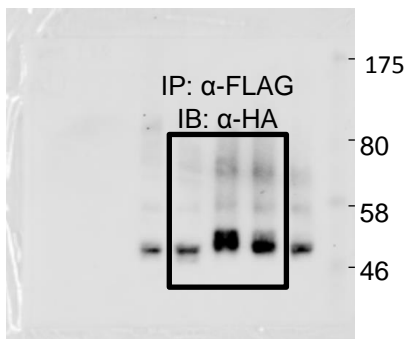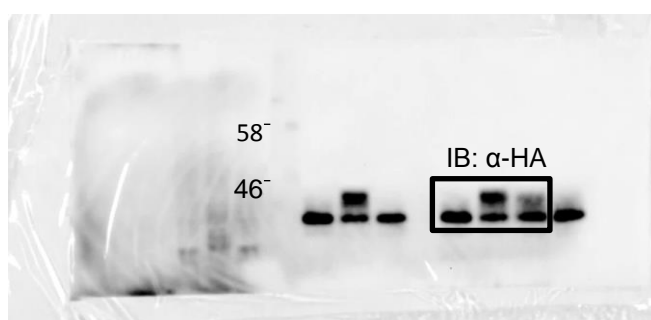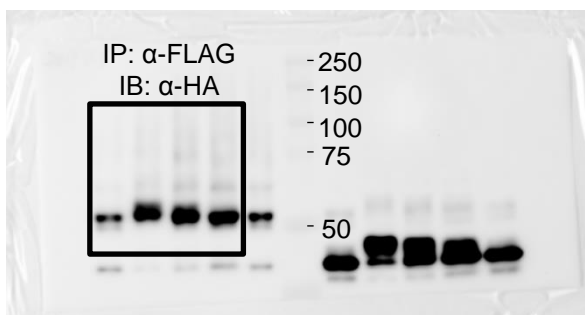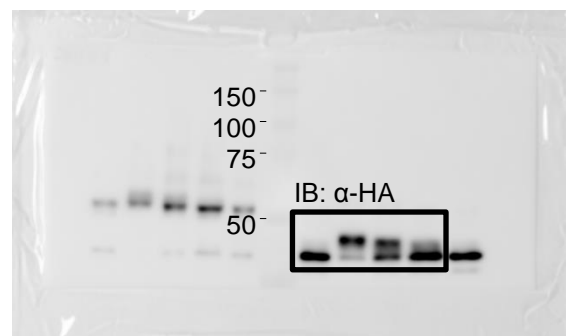



### Extended Data Figure 2k

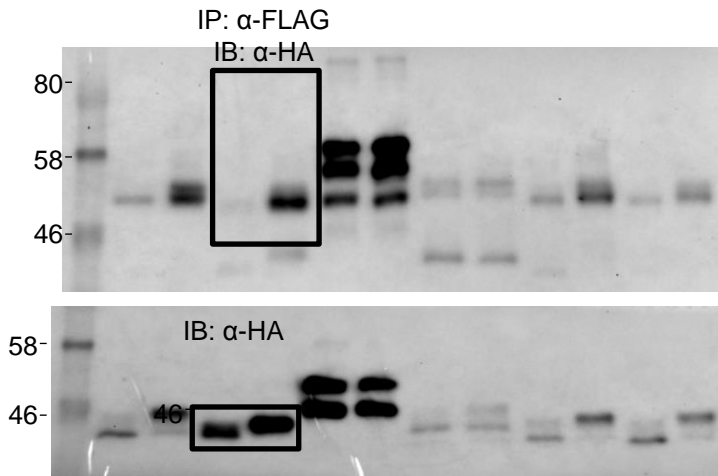

### Extended Data Figure 2l

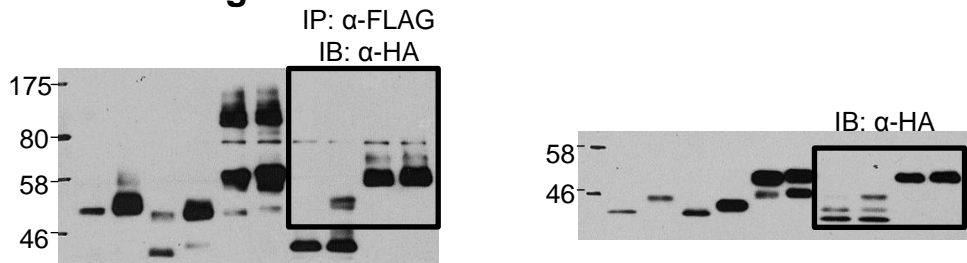

### Extended Data Figure 3a

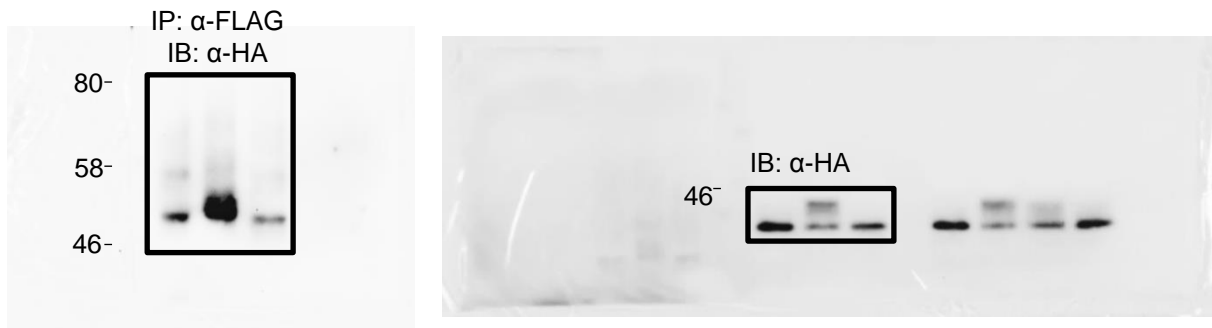

### Extended Data Figure 3c

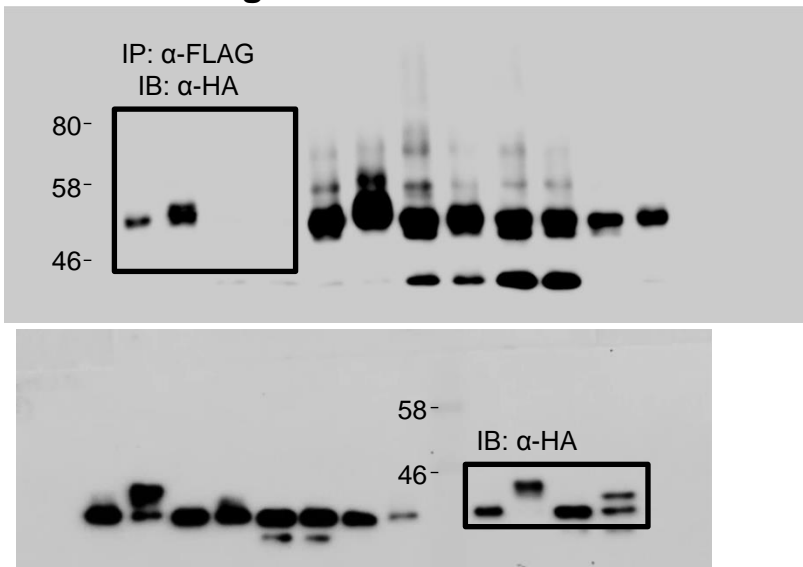

### Extended Data Figure 3d

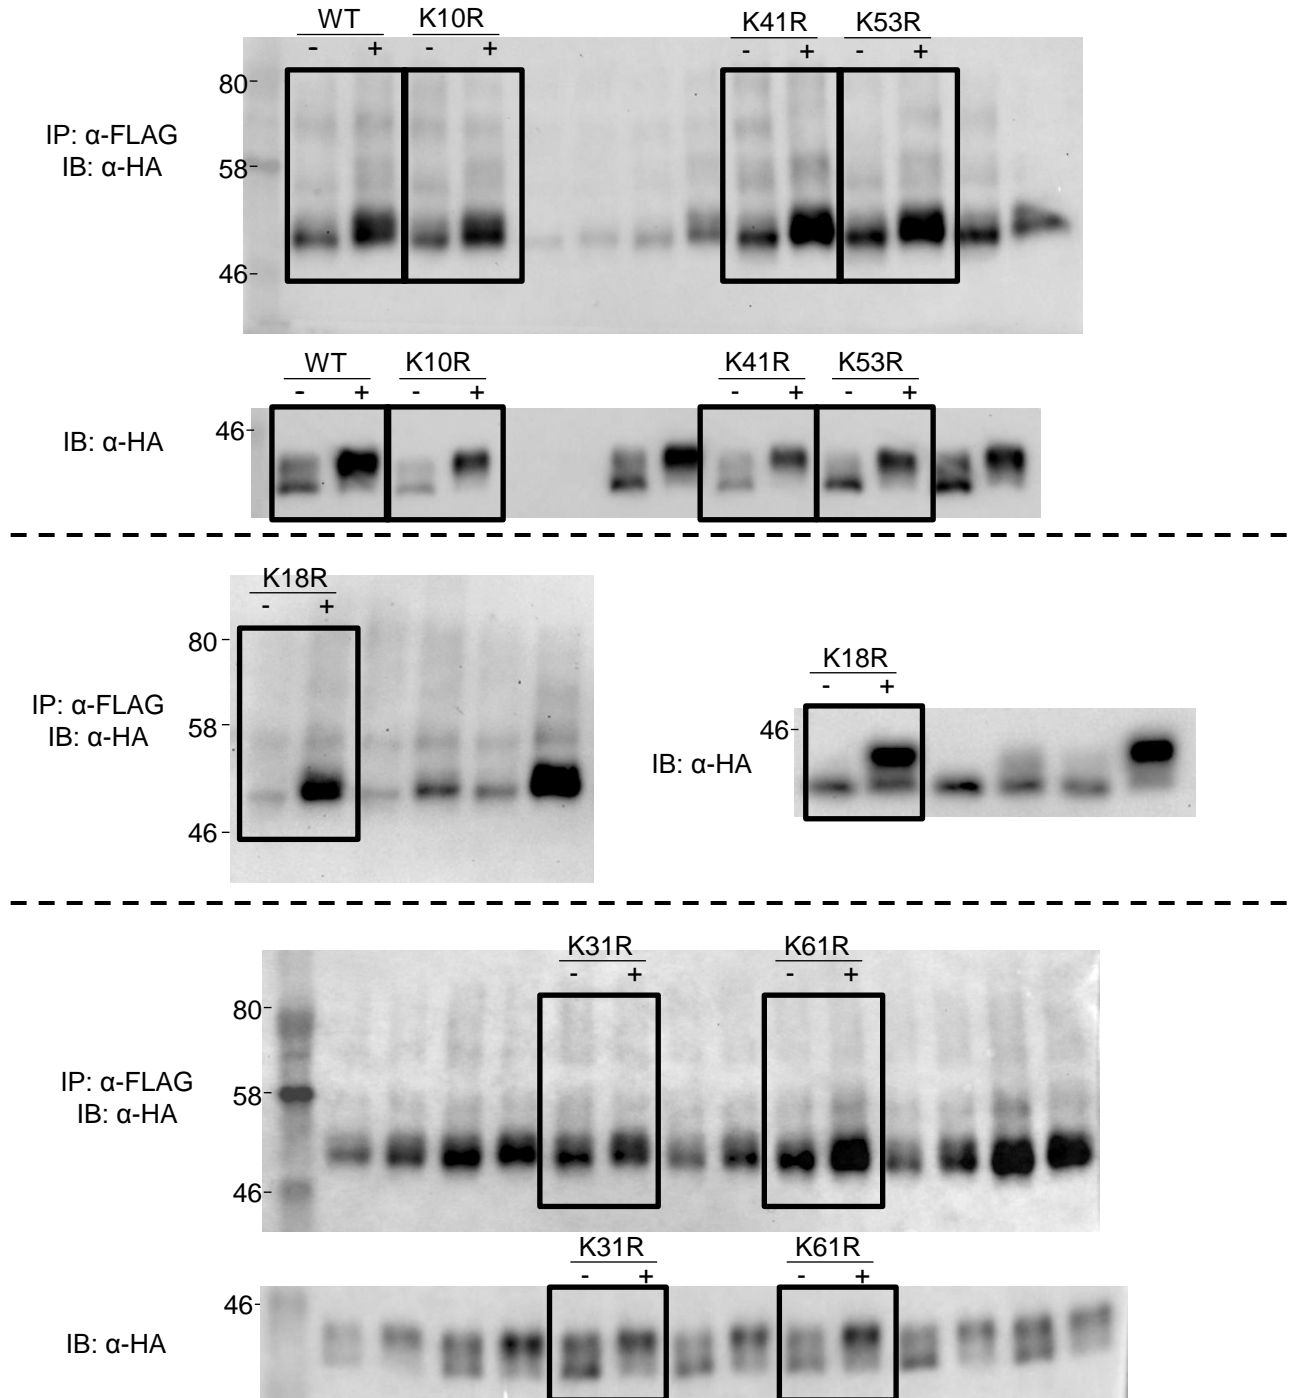

# Extended Data Figure 3d continued

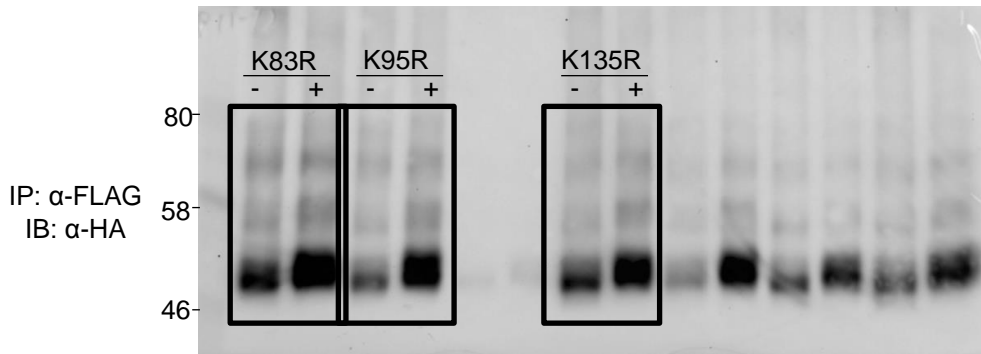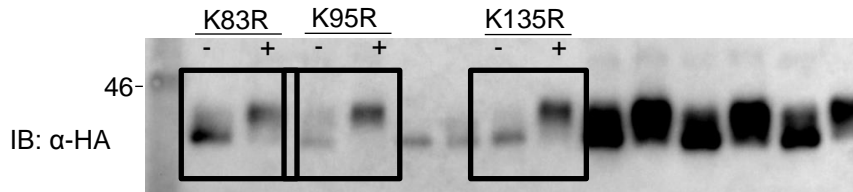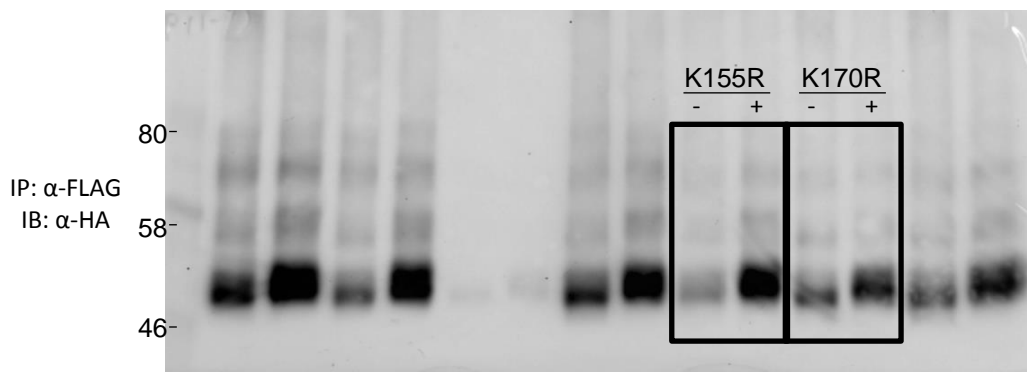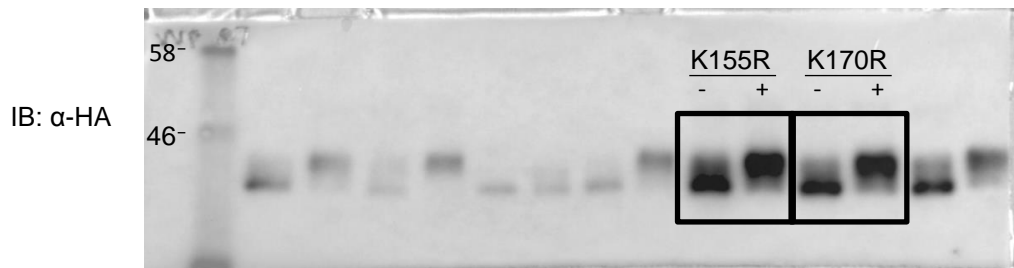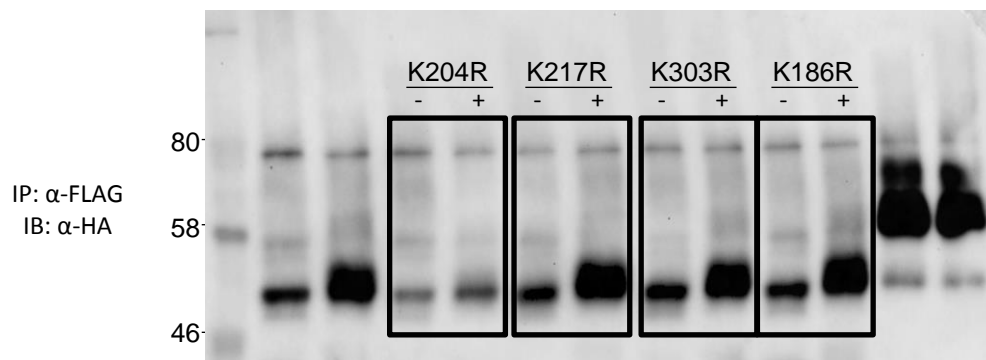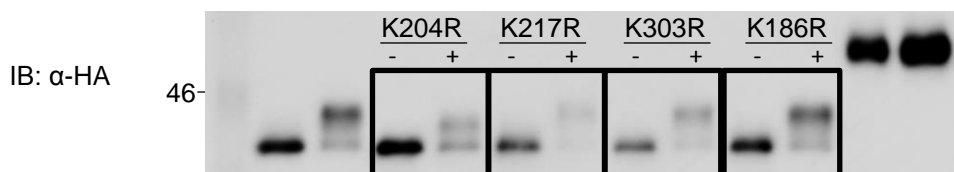

# Extended Data Figure 3d continued

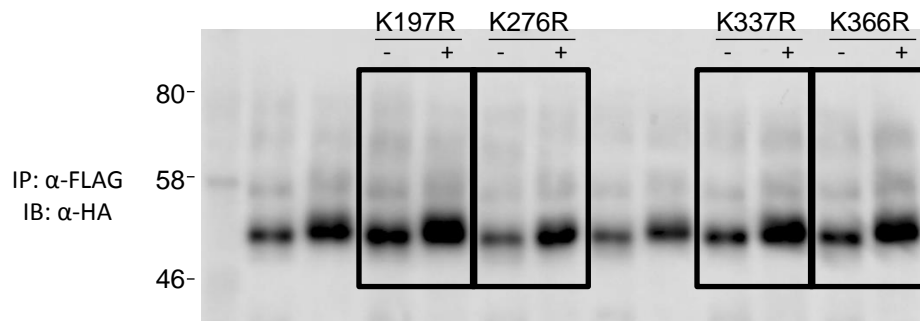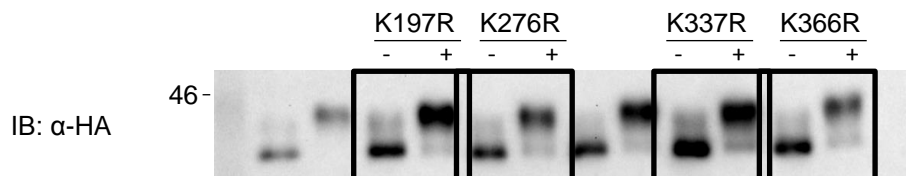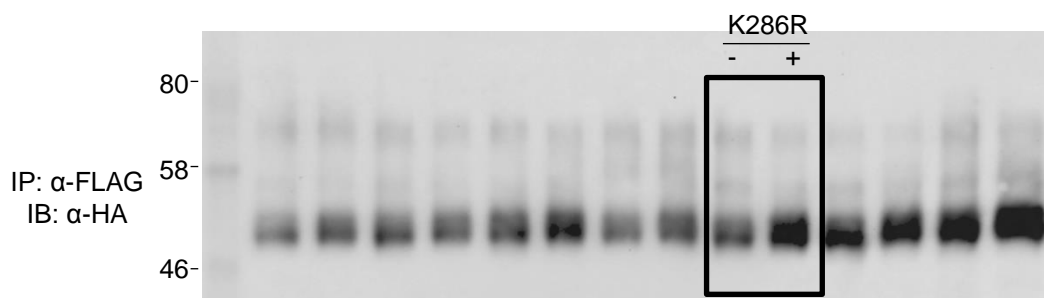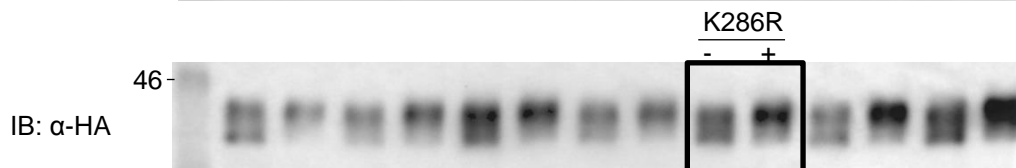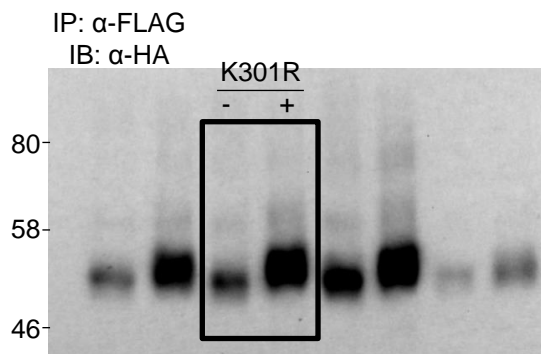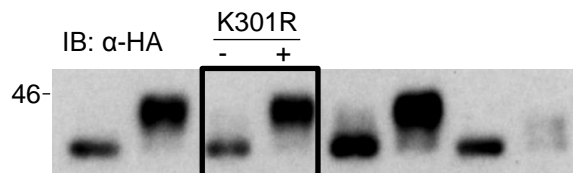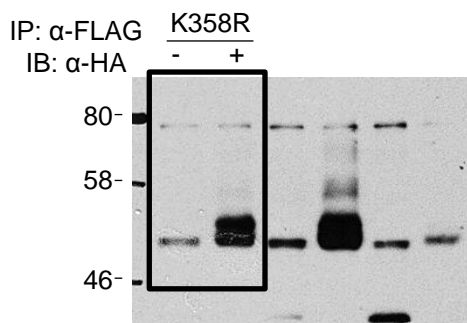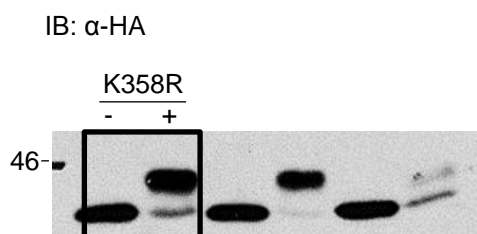

## Extended Data Figure 3d continued

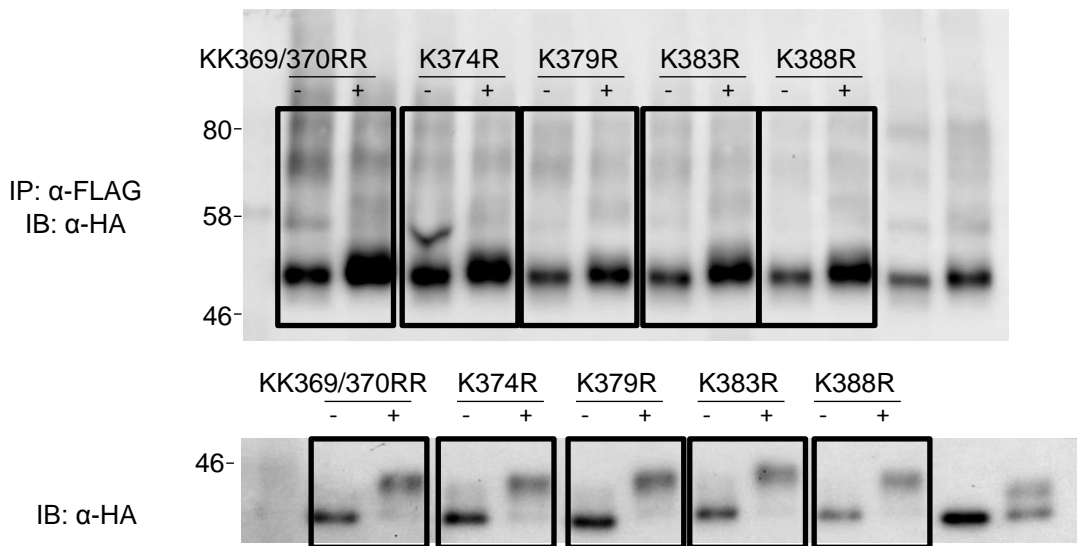

## Extended Data Figure 3e

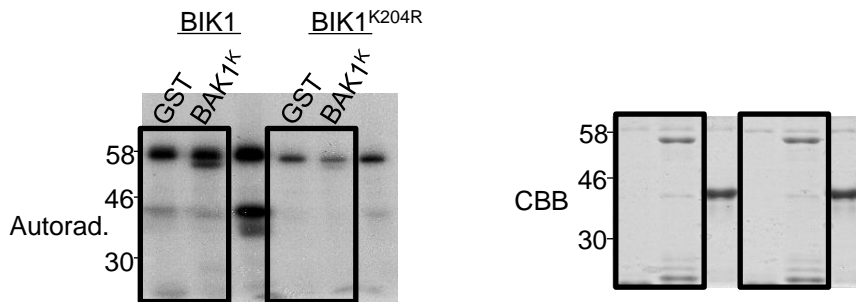

## Extended Data Figure 4a

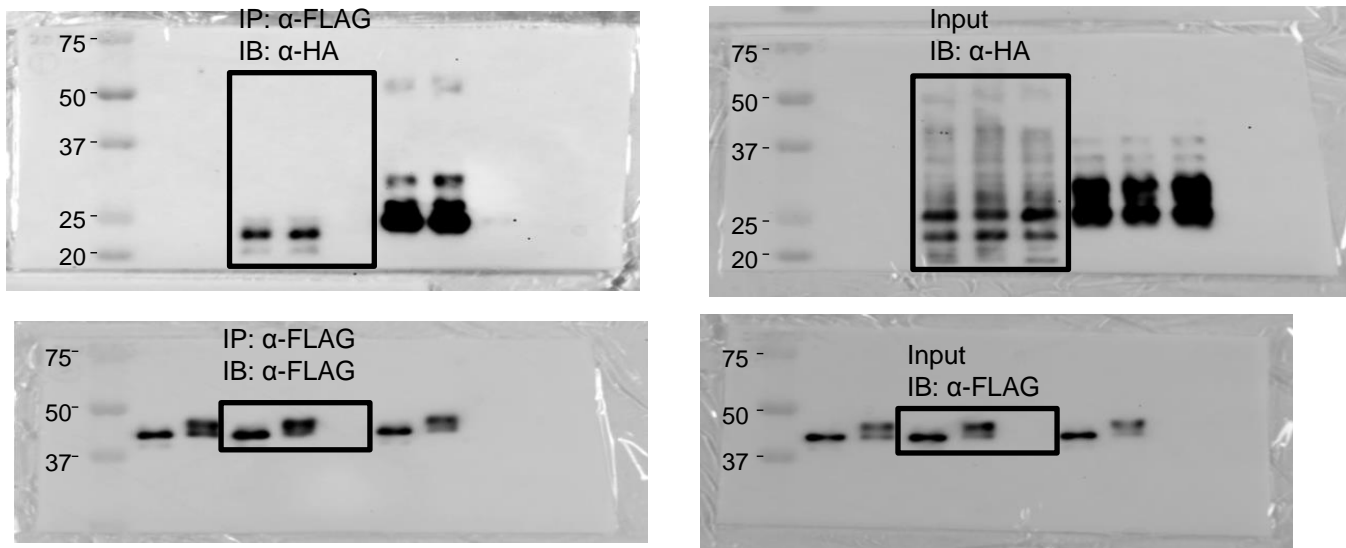

### Extended Data Figure 4c

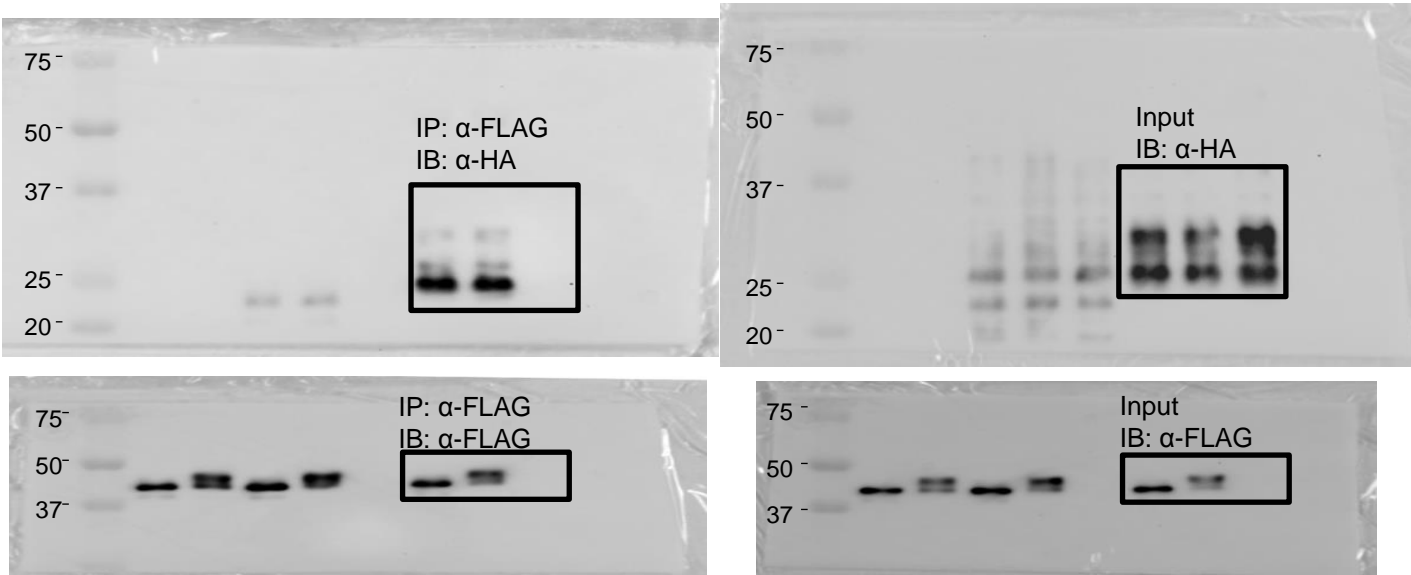

### Extended Data Figure 4d

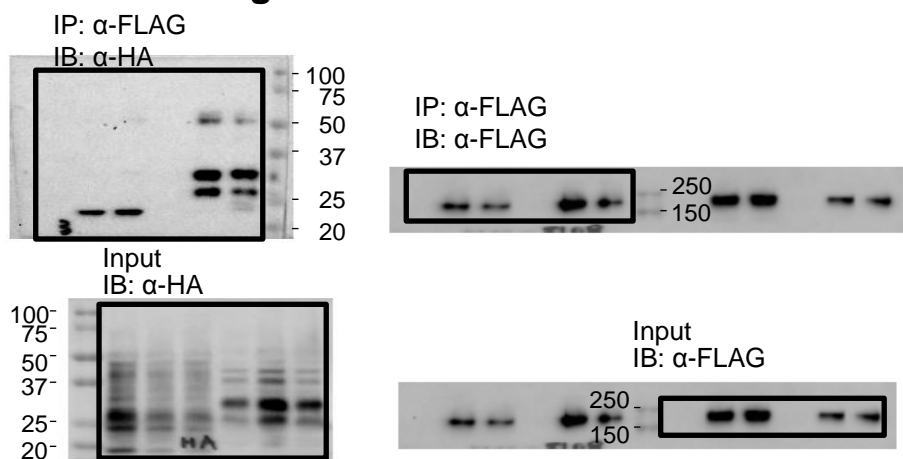

### Extended Data Figure 5a

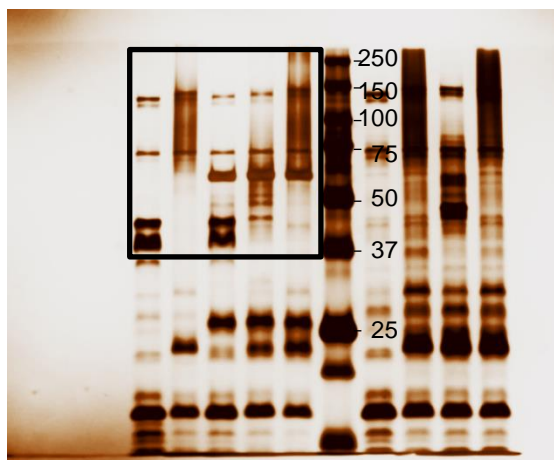

### Extended Data Figure 5b

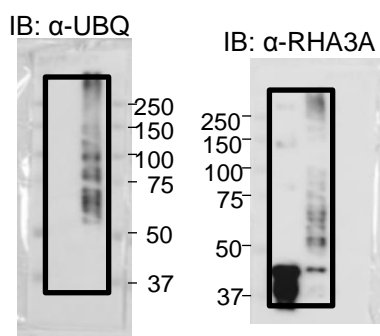

### Extended Data Figure 5d

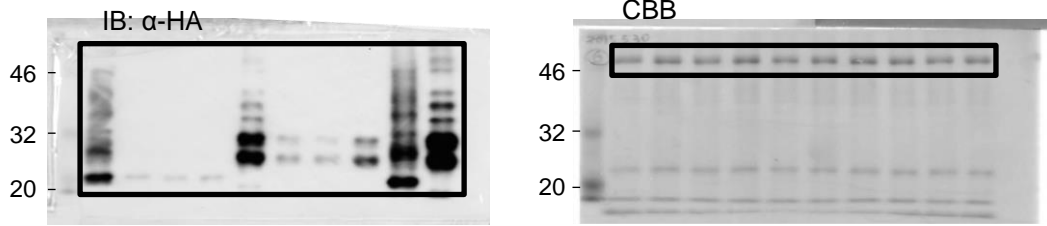

### Extended Data Figure 5e

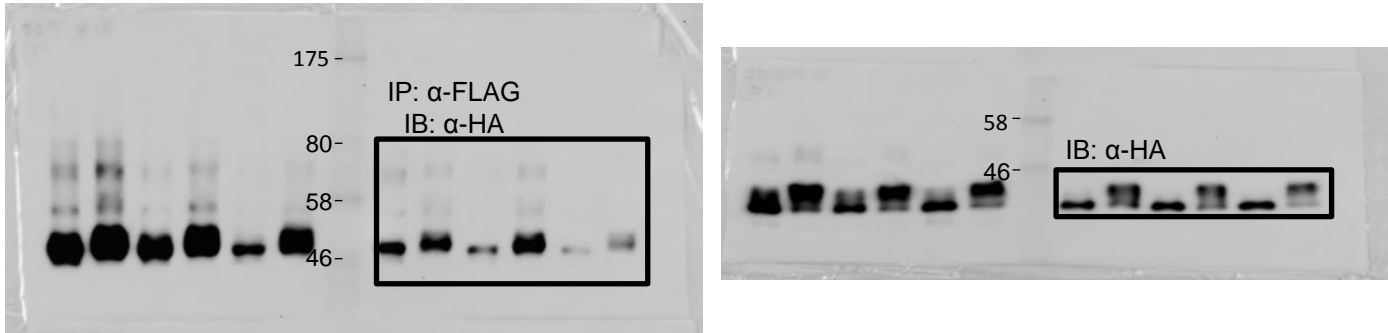

### Extended Data Figure 5g

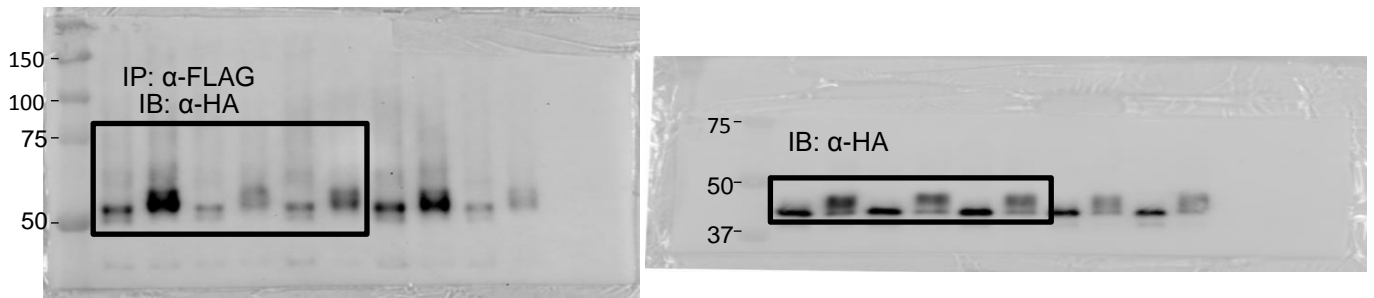

### Extended Data Figure 7a

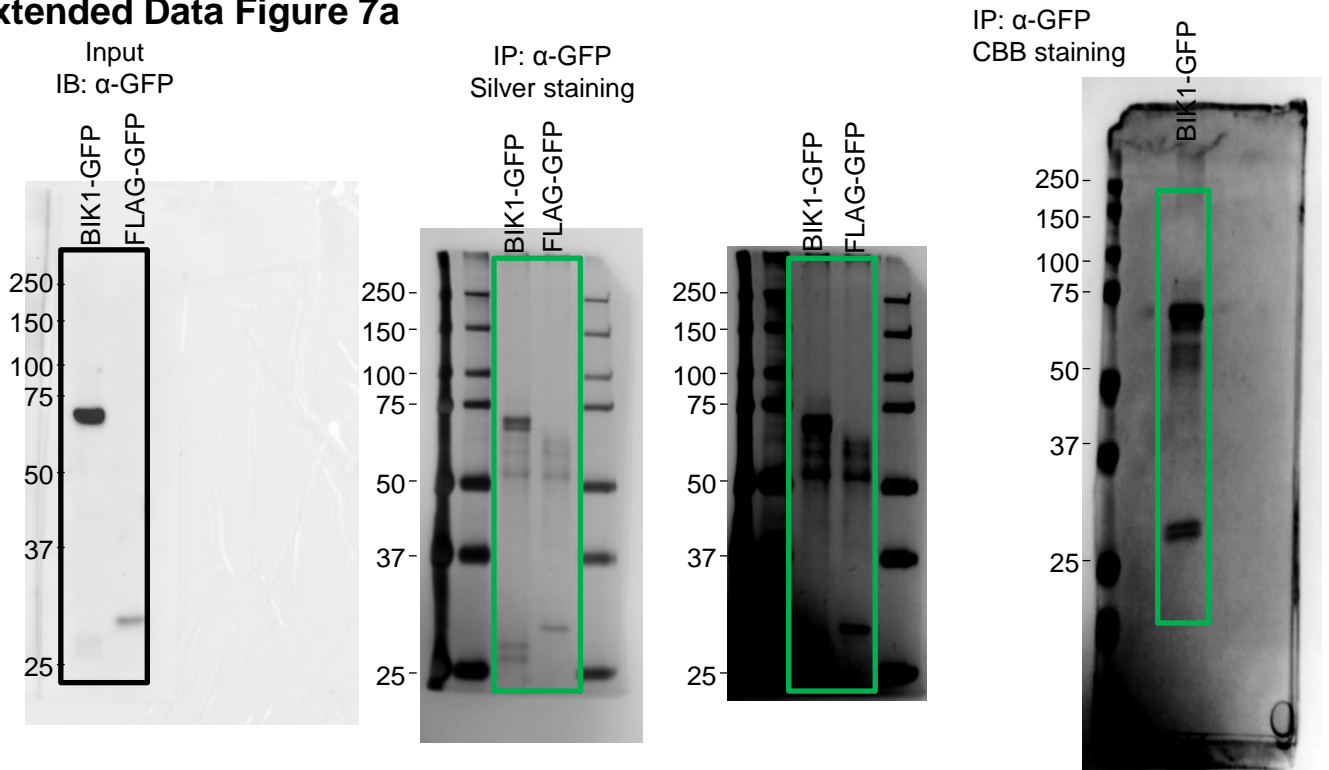

## Extended Data Figure 8a

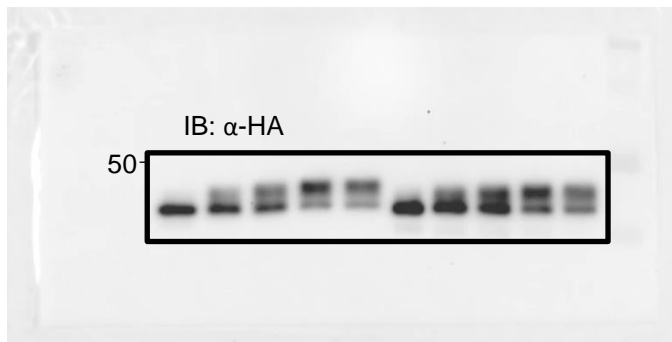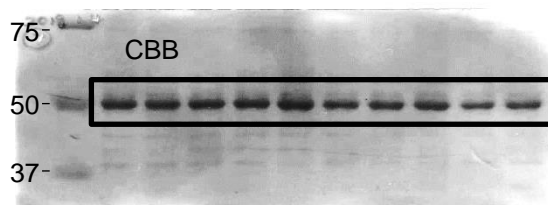

## Extended Data Figure 8b

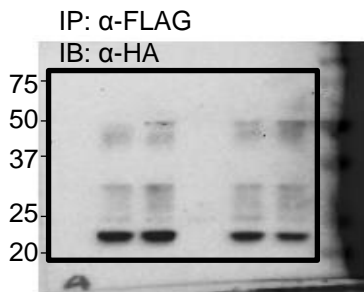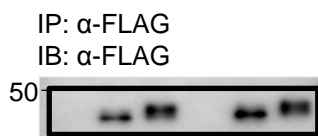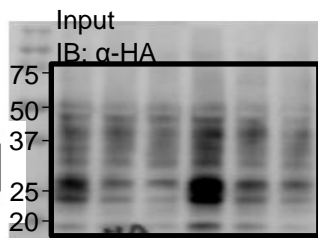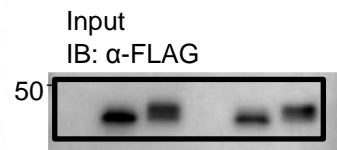

## Extended Data Figure 8c

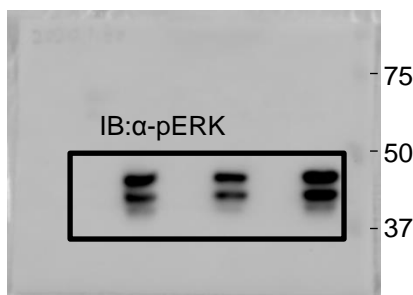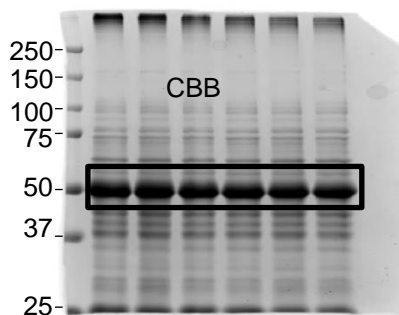

## Extended Data Figure 8f

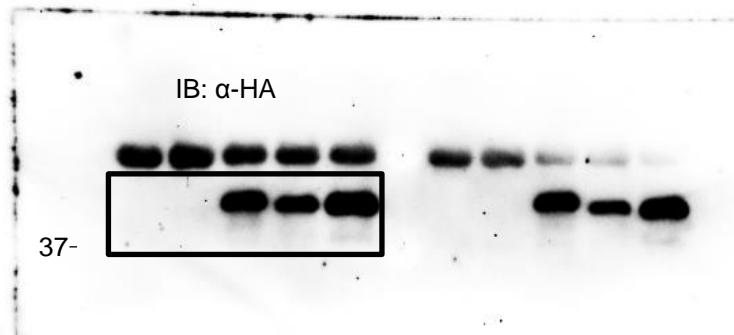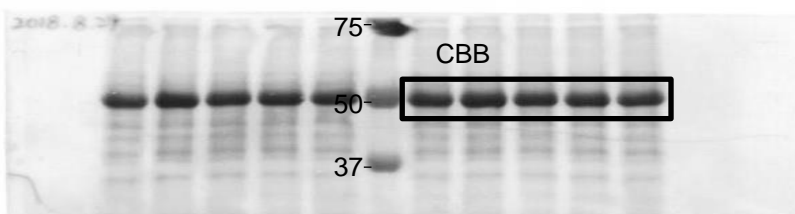



### Extended Data Figure 10a

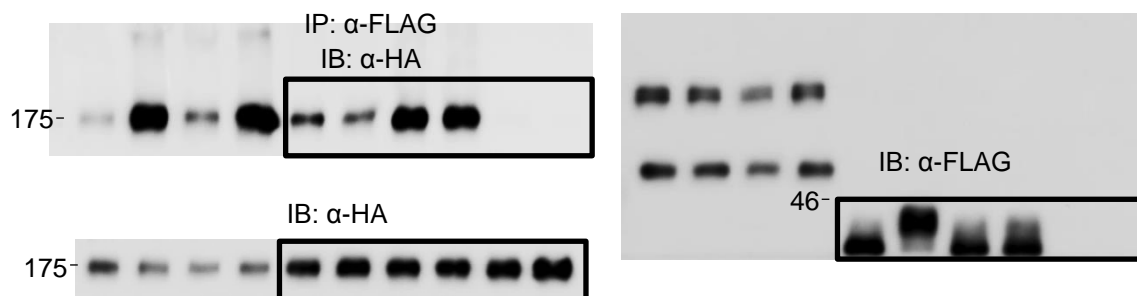

### Extended Data Figure 10c

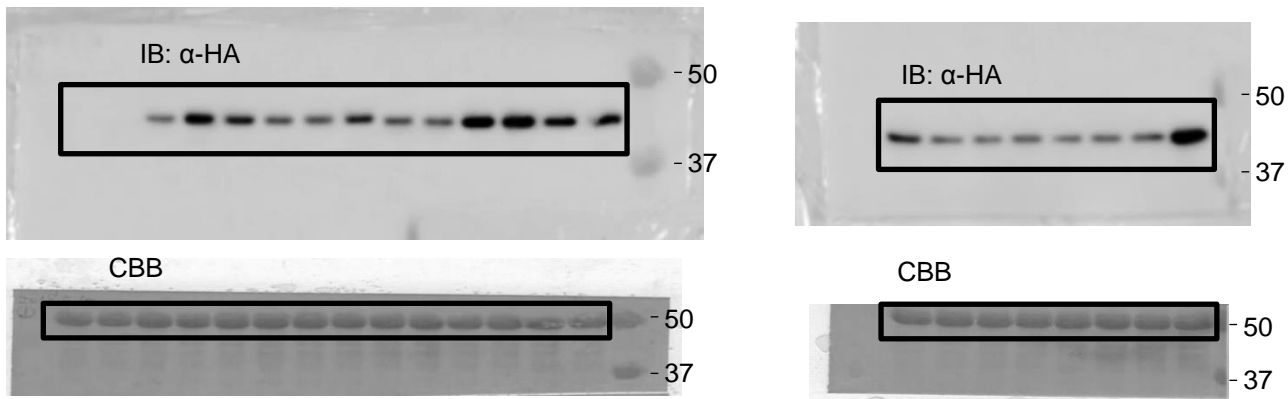

### Extended Data Figure 10d

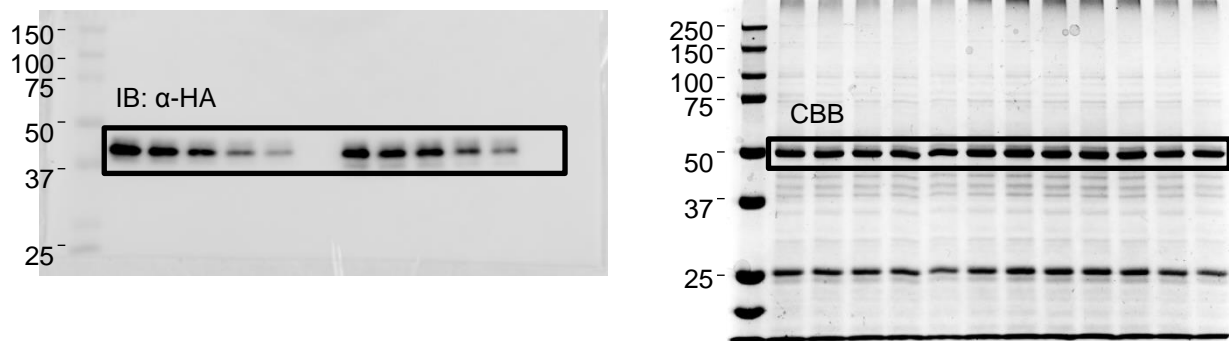

## Supplementary Table 1. Primers used in this study

### Cloning primers

| Primer           | Sequence                         |
|------------------|----------------------------------|
| RHA3A-BamHI-F    | CGGGATCCATGACTCGACCGTCAAGATTAC   |
| RHA3A-StuI-R     | GAAGGCCTAGGAAGAAACGTAGGAATGGTAG  |
| RHA3B-BamHI-F    | CGGGATCCATGACTCGCTCCTCTAGATTC    |
| RHA3B-SmaI-R     | TCCCCCGGGAGGAAGAAAAGCAGGAATAATG  |
| RHA3A-CD-BamHI-F | CGGGATCCCGATGCGCTTGGCTCCGGCG     |
| RHA3B-CD-BamHI-F | CGGGATCCGCTCGCTGCGCTTGGCTCCGC    |
| pRHA3A-SacI-F    | CCGGAGCTCCTCAATTTGATAGAATTTCTCCG |
| pRHA3A-BamHI-R   | CGGGATCCTGCTTTTTGAGCTTTGGAGAC    |
| pRHA3B-SacI-F    | TCCGAGCTCGCTTCCGTTCTCAATTATTG    |
| pRHA3B-BamHI-R   | CGGGATCCTTTGTTTTGGTTTTGAGTTC     |
| NOS-SacI-R       | CCGGAGCTCGAATACTCATGTTTGACAGC    |
| Usp2-cc-BamHI-F  | CGGGATCCAATCAAAGAGTGCCAGGGTC     |
| Usp2-cc-SmaI-R   | TCCCCCGGGCATAACGGGAGGGTGGACTGGC  |

The restriction enzyme sites are underlined.

### Point mutation primers

| Primer       | Sequence                                      |
|--------------|-----------------------------------------------|
| BIK1 K10R-F  | CTTCAGTTCTCGAGTCA <u>G</u> AGCAGACATCTTCCAC   |
| BIK1 K10R-R  | GTGGAAGATGTCTGCT <u>C</u> TGACTCGAGAACTGAAG   |
| BIK1 K18R-F  | CATCTTCCACAATGGTA <u>G</u> GAGCAGCGATCTTTATG  |
| BIK1 K18R-R  | CATAAAGATCGCTGCTC <u>C</u> TACCATTGTGGAAGATG  |
| BIK1 K31R-F  | GTCTCTCAAGTCGGA <u>G</u> ATCGTCTTCGACTGTAG    |
| BIK1 K31R-R  | CTACAGTCGAAGACGAT <u>C</u> TCCGACTTGAGAGAC    |
| BIK1 K41R-F  | CGGCGGCTCAGA <u>G</u> GACGGAAGGGGAG           |
| BIK1 K41R-R  | CTCCCCTTCCGTC <u>C</u> TCTGAGCCGCCG           |
| BIK1 K53R-F  | GAGTTCGACCCCTGTC <u>A</u> GAAGCTTCACCTTTAACG  |
| BIK1 K53R-R  | CGTTAAAGGTGAAGCTT <u>C</u> TGACAGGGGTGCAACTC  |
| BIK1 K61R-F  | CACCTTTAACGAACCTCA <u>G</u> ACTCGCCACAAGAAAC  |
| BIK1 K61R-R  | GTTTCTTGTTGGCGAGT <u>C</u> TGAGTTTCGTTAAAGGTG |
| BIK1 K83R-F  | CTTTGGTTGTGTCTTTA <u>G</u> AGGCTGGTTAGATGAG   |
| BIK1 K83R-R  | CTCATCTAACCGCCT <u>C</u> TAAAGACACAACCAAAG    |
| BIK1 K95R-F  | CACTCTCACTCCGACTA <u>G</u> ACCTGGAACCGGTTTG   |
| BIK1 K95R-R  | CAAACCGGTTCCAGGT <u>C</u> TAGTCGGAGTGAGAGTG   |
| BIK1 K135R-F | CACCCAAATCTAGTTA <u>G</u> ACTGATCGGTTATTGC    |
| BIK1 K135R-R | GCAATAACCGATCAGT <u>C</u> TAACTAGATTTGGGTG    |
| BIK1 K155R-F | CTACGAGTTTATGCAA <u>A</u> GAGGAAGTCTTGAGAATC  |

|                    |                                               |
|--------------------|-----------------------------------------------|
| BIK1 K155R-R       | GATTCTCAAGACTTCCT <u>CT</u> TTGCATAAACTCGTAG  |
| BIK1 K170R-F       | GAGGTGCATATTTTA <u>GG</u> CCACTCCCATGGTTTC    |
| BIK1 K170R-R       | GAAACCATGGGAGTGGC <u>CT</u> AAAATATGCACCTC    |
| BIK1 K186R-F       | GCGCTTGATGCAGCA <u>AG</u> GGGGCTTGCTTTTCTTC   |
| BIK1 K186R-R       | GAAGAAAAGCAAGCCCC <u>CT</u> TGCTGCATCAAGCGC   |
| BIK1 K197R-F       | CACAGCGATCCCGTCA <u>AG</u> AGTGATATACCGAGAC   |
| BIK1 K197R-R       | GTCTCGGTATATCACT <u>CT</u> GACGGGATCGCTGTG    |
| BIK1 K204R-F       | GATATACCGAGACATT <u>AG</u> AGCCTCGAACATCTTAC  |
| BIK1 K204R-R       | GTAAGATGTTTCGAGGCT <u>CT</u> AATGTCTCGGTATATC |
| BIK1 K217R-F       | GCGGACTACAACGCA <u>AG</u> ACTTTCTGACTTTGGAC   |
| BIK1 K217R-R       | GTCCAAAGTCAGAAAGT <u>CT</u> TGCGTTGTAGTCCGC   |
| BIK1 K276R-F       | GAGATTTTATCTGGT <u>AG</u> GGCAGCGTTGGATC      |
| BIK1 K276R-R       | GATCCAACGCTCGC <u>CT</u> ACCAGATAAAATCTC      |
| BIK1 K286R-F       | CATAACAGACCGGCT <u>AG</u> AGAAGAAAACCTTGTG    |
| BIK1 K286R-R       | CACAAGGTTTTCTTCT <u>CT</u> AGCCGGTCTGTTATG    |
| BIK1 K301R-F       | CGTACCTCACAAGCA <u>AG</u> ACGTAAGGTTCTCCTAATC |
| BIK1 K301R-R       | GATTAGGAGAACCTTACGT <u>CT</u> GCTTGTGAGGTACG  |
| BIK1 K303R-F       | CCTCACAAGCAAACGT <u>AG</u> GGTTCTCCTAATCGTGG  |
| BIK1 K303R-R       | CCACGATTAGGAGAACC <u>CT</u> TACGTTTGCTTGTGAGG |
| BIK1 K337R-F       | CTCTCATTTGAACCA <u>AG</u> GTCGCGCCCGACCATG    |
| BIK1 K337R-R       | CATGGTCGGGCGCGAC <u>CT</u> GGGTTCAAATGAGAG    |
| BIK1 K358R-F       | GGACAACCTGGGA <u>CGG</u> CCGAGTCAGACC         |
| BIK1 K358R-R       | GGTCTGACTCGG <u>CCG</u> TCCCAAGTTGTCC         |
| BIK1 K366R-F       | CAGACCAATCCGGTT <u>AG</u> GGATACCAAGAACTTG    |
| BIK1 K366R-R       | CAAGTTTCTTGGTATCC <u>CT</u> AACCGGATTGGTCTG   |
| BIK1 KK369/370RR-F | CGGTTAAGGATACC <u>AGGAG</u> ACTTGGTTTTAAACTG  |
| BIK1 KK369/370RR-R | CAGTTTTAAACCAAGT <u>CTCCT</u> GGTATCCTTAACCG  |
| BIK1 K374R-F       | CAAGAAACTTGGTTTT <u>AG</u> AACTGGTACTACTAAG   |
| BIK1 K374R-R       | CTTAGTAGTACCAGTT <u>CT</u> AAAACCAAGTTTCTTG   |
| BIK1 K379R-F       | GTTTTAAACTGGTACTACT <u>AGG</u> TCATCCGAAAAACG |
| BIK1 K379R-R       | CGTTTTTCGGATGAC <u>CT</u> AGTAGTACCAGTTTTAAAC |
| BIK1 K383R-F       | CTAAGTCATCCGAA <u>AG</u> ACGGTTTACACAAAAC     |
| BIK1 K383R-R       | GTTTTTGTGTAAACCGT <u>CT</u> TTTCGGATGACTTAG   |
| BIK1 K388R-F       | GAAAAACGGTTTACACAA <u>AG</u> ACCTTTTGGCAGGC   |
| BIK1 K388R-R       | GCCTGCCAAAAGGT <u>CT</u> TTTGTGTAAACCGTTTTTC  |
| RHA3A I104A-F      | CGACGGAATGTGCT <u>GCT</u> TGCCTCACTGACTTC     |
| RHA3A I104A-R      | GAAGTCAGTGAGGCA <u>GC</u> AGCACATTCCGTCG      |

The codon of targeted amino acids is underlined. Mutated nucleotides are marked as red.

**amiRNA primers**

| Primer            | Sequence                                  |
|-------------------|-------------------------------------------|
| RHA3A amiRNA480-1 | GATTTTGTCAATACACTCCACGGTCTCTCTTTTGTATTCC  |
| RHA3A amiRNA480-2 | GACCGTGGAGTGTATTGACAAAATCAAAGAGAATCAATGA  |
| RHA3A amiRNA480-3 | GACCATGGAGTGTATAGACAAATTCACAGGTCGTGATATG  |
| RHA3A amiRNA480-4 | GAATTTGTCTATACACTCCATGGTCTACATATATATTCCCT |
| RHA3A amiRNA109-1 | GATCAAGTAATCTTGACGGTCGTTCTCTCTTTTGTATTCC  |
| RHA3A amiRNA109-2 | GAACGACCGTCAAGATTACTTGATCAAAGAGAATCAATGA  |
| RHA3A amiRNA109-3 | GAACAACCGTCAAGAATACTTGTTACAGGTCGTGATATG   |
| RHA3A amiRNA109-4 | GAACAAGTATTCTTGACGGTTGTTCTACATATATATTCCCT |
| RHA3A amiRNA211-1 | GATCAACGCAGATAAGAGCGCTATCTCTCTTTTGTATTCC  |
| RHA3A amiRNA211-2 | GATAGCGCTCTTATCTGCGTTGATCAAAGAGAATCAATGA  |
| RHA3A amiRNA211-3 | GATAACGCTCTTATCAGCGTTGTTACAGGTCGTGATATG   |
| RHA3A amiRNA211-4 | GAACAACGCTGATAAGAGCGTTATCTACATATATATTCCCT |
| RHA3B amiRNA444-1 | GATTATGCATATTGCACACTCCGTCTCTCTTTTGTATTCC  |
| RHA3B amiRNA444-2 | GACGGAGTGTGCAATATGCATAATCAAAGAGAATCAATGA  |
| RHA3B amiRNA444-3 | GACGAAGTGTGCAATTTGCATATTCACAGGTCGTGATATG  |
| RHA3B amiRNA444-4 | GAATATGCAAATTGCACACTTCGTCTACATATATATTCCCT |
| RHA3B amiRNA113-1 | GATAATCTAGAGGAGCGAGTCAGTCTCTCTTTTGTATTCC  |
| RHA3B amiRNA113-2 | GACTGACTCGCTCCTCTAGATTATCAAAGAGAATCAATGA  |
| RHA3B amiRNA113-3 | GACTAACTCGCTCCTGTAGATTTTCACAGGTCGTGATATG  |
| RHA3B amiRNA113-4 | GAAAATCTACAGGAGCGAGTTAGTCTACATATATATTCCCT |
| RHA3B amiRNA214-1 | GATCTACGCATACGAGAGCGCATTCTCTCTTTTGTATTCC  |
| RHA3B amiRNA214-2 | GAATGCGCTCTCGTATGCGTAGATCAAAGAGAATCAATGA  |
| RHA3B amiRNA214-3 | GAATACGCTCTCGTAAGCGTAGTTCACAGGTCGTGATATG  |
| RHA3B amiRNA214-4 | GAECTACGCTTACGAGAGCGTATTCTACATATATATTCCCT |

**CRISPR cloning primers**

| Primer     | Sequence                                        |
|------------|-------------------------------------------------|
| L1L2T2-BsF | ATATATGGTCTCGATTGAGCCAAGCGCATCGTACGAGTT         |
| L1L2T2-F   | TGAGCCAAGCGCATCGTACGAGTTTTAGAGCTAGAAAT<br>AGC   |
| L1L2T4-R   | AACGAGTTAATCCCGCCGCGTCAATCTCTTAGTCTGACT<br>CTAC |
| L1L2T4-BsR | ATTATTGGTCTCGAAACGAGTTAATCCCGCCGCGTC            |

**qRT-PCR primers**

| Primer   | Sequence              |
|----------|-----------------------|
| RHA3A-F  | CAGGATTCTTACGCCGGTGA  |
| RHA3A-R  | TTCATCTCCGCCGTAGAAGC  |
| RHA3B-F  | CGGAGGGCGAAGAAATCAGA  |
| RHA3B-R  | CACTTCACCGGCACCAGTAT  |
| ACTIN2-F | GCACCCTGTTCTTCTTACGGA |
| ACTIN2-R | GTGAGACACACCATCACCAGA |
